# Supplementary material for: Unraveling the interaction between singlet state atomic oxygen O(1D) and water: toward the formation of oxywater and hydrogen peroxide
Source: Royal Society of Chemistry journal article supplement (doi:10.1039/d4cp00969j), 2024-01-01
Supplement: d4cp00969j1.pdf [file d4cp00969j1.pdf]

## SUPPORTING INFORMATION

# Unraveling the interaction between singlet state atomic oxygen O(<sup>1</sup>D) and water: toward the formation of oxywater and hydrogen peroxide

Jos Suijker<sup>†</sup> and Behnaz Bagheri<sup>\*,†,‡</sup>

<sup>†</sup>*Department of Applied Physics and Science Education, Technical University of Eindhoven,  
PO Box 513, 5600 MB, Eindhoven, The Netherlands.*

<sup>‡</sup>*Institute for Complex Molecular Systems, PO Box 513, 5600 MB, Eindhoven, The  
Netherlands.*

E-mail: b.bagheri@tue.nl

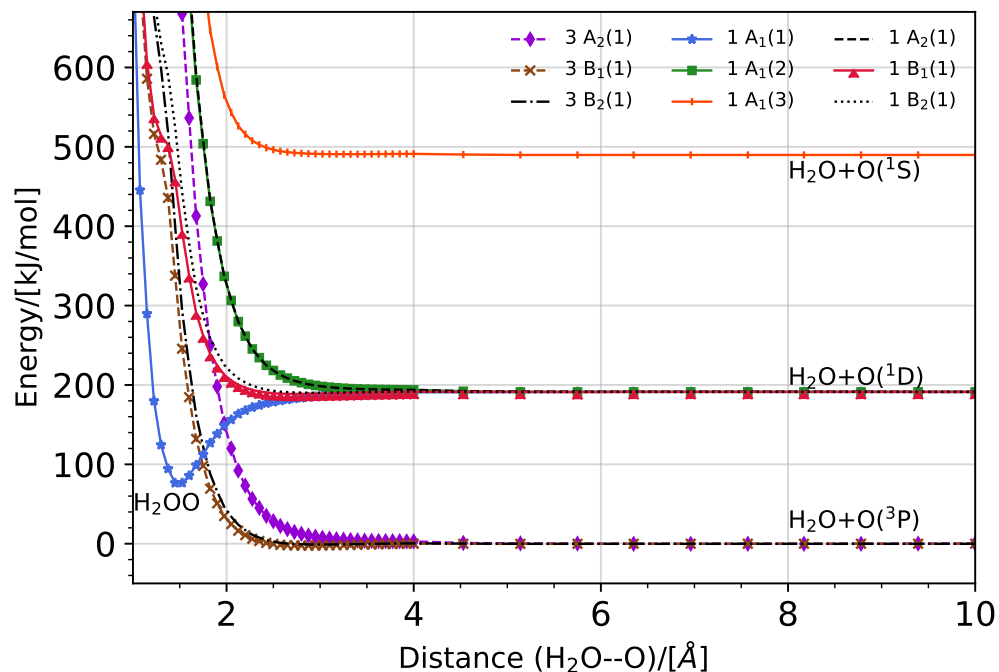

Figure S1: Potential energy curve for O.OH<sub>2</sub> complex along the oxygen–oxygen coordinate, from 1 Å to 10 Å, at the (10,8)CASSCF-SC-NEVPT2/cc-pVTZ level of theory. The lowest lying states on the triplet energy surface, <sup>3</sup>P, on the singlet energy surface, <sup>1</sup>D, and on the second excited energy surface, <sup>1</sup>S, are shown. The energies are plotted with respect to the energy of a H<sub>2</sub>O molecule and an O(<sup>3</sup>P) atom at oxygen–oxygen distance of 10 Å. The geometry of H<sub>2</sub>O at each distance point is held fixed.

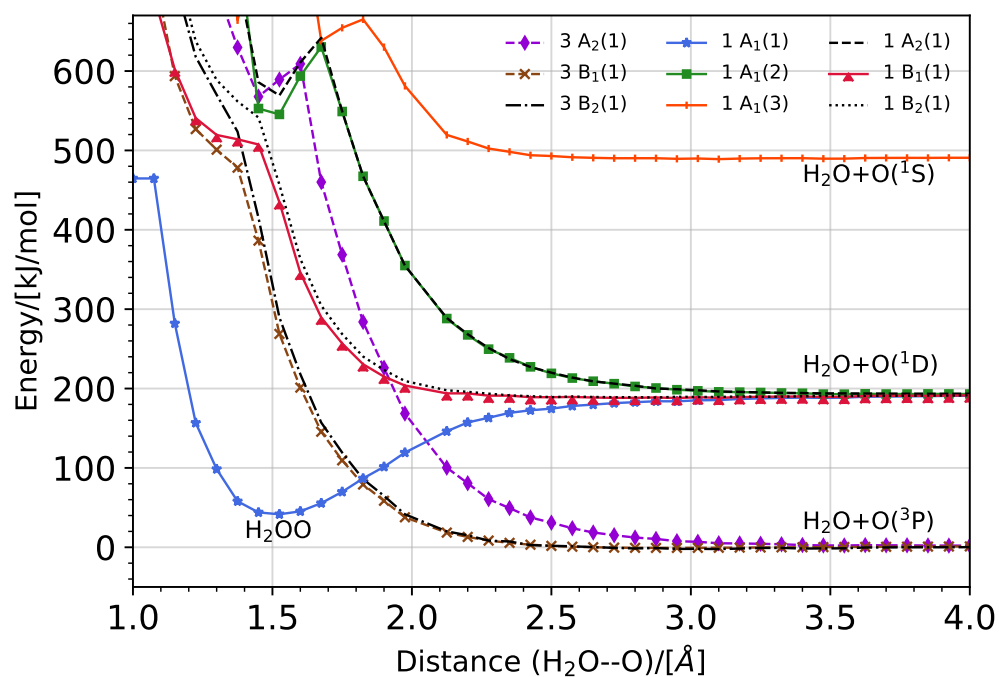

Figure S2: Potential energy curve for O.OH<sub>2</sub> complex along the oxygen–oxygen coordinate at the (10,8)CASSCF-SC-NEVPT2/cc-pVTZ level of theory. The lowest lying states on the triplet energy surface, <sup>3</sup>P, on the singlet energy surface, <sup>1</sup>D, and on the second excited energy surface, <sup>1</sup>S, are shown. The energies are plotted with respect to the energy of a H<sub>2</sub>O molecule and an O(<sup>3</sup>P) atom at oxygen–oxygen distance of 10 Å (see Figure S1). The geometry of H<sub>2</sub>O at each distance point is allowed to be optimized.

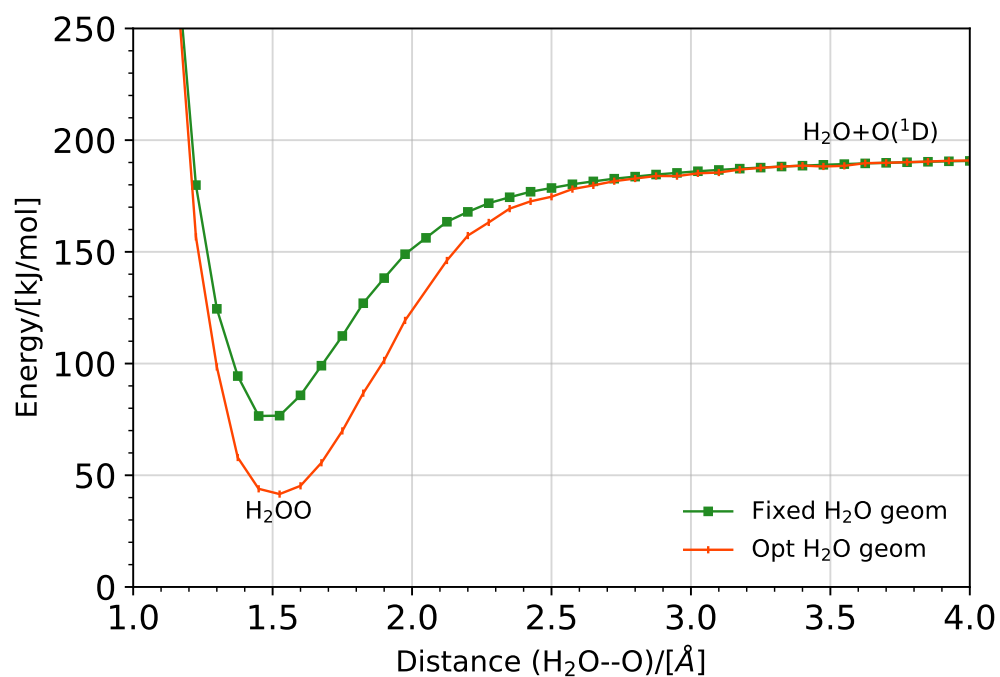

Figure S3: Potential energy curve for O.OH<sub>2</sub> complex along the oxygen–oxygen coordinate at the (10,8)CASSCF-SC-NEVPT2/cc-pVTZ level of theory. The lowest lying state on the singlet energy surface, 1A<sub>1</sub>(1), is shown for the calculations in which the geometry of H<sub>2</sub>O at each distance point is optimized versus the calculations that the geometry of H<sub>2</sub>O is fixed. The energies are plotted with respect to the energy of a H<sub>2</sub>O molecule and an O(<sup>3</sup>P) atom at oxygen–oxygen distance of 10 Å (see Figure S1).
